# Supplementary material for: Synthesis and Characterization of Block Copolymers of Poly(silylene diethynylbenzen) and Poly(silylene dipropargyl aryl ether)
Source: MDPI journal article supplement (doi:10.3390/polym13091511), 2021-05-07
Supplement: s1 [file s1]

## Supporting Information

### Synthesis and characterization of block copolymers of poly(silylene arylacetylene) and poly(silylene dipropargyl aryl ether)

Man Gao <sup>1</sup>, Chengyuan Shang <sup>2</sup>, Jixian Li <sup>1</sup>, Gang Han <sup>1</sup>, Junkun Tang <sup>1</sup>,  
Qiaolong Yuan <sup>1</sup> and Farong Huang <sup>1,\*</sup>

<sup>1</sup> Key Laboratory of Specially Functional Polymeric Materials and Related Technology (Ministry of Education), School of Materials Science and Engineering, East China University of Science and Technology, Shanghai 200237, China; mangao96@163.com (M.G.); chmxy521@163.com (J.L.); ganghmail@163.com (G.H.); jktang@ecust.edu.cn (J.K.); qlyuan@ecust.edu.cn (Q.Y.)

<sup>2</sup> Research and Application Center for Structural Composites, Aerospace Research Institute of Materials & Processing Technology, Beijing 100076, China; shangchengyuan@163.com

\* Correspondence: fhuanglab@ecust.edu.cn

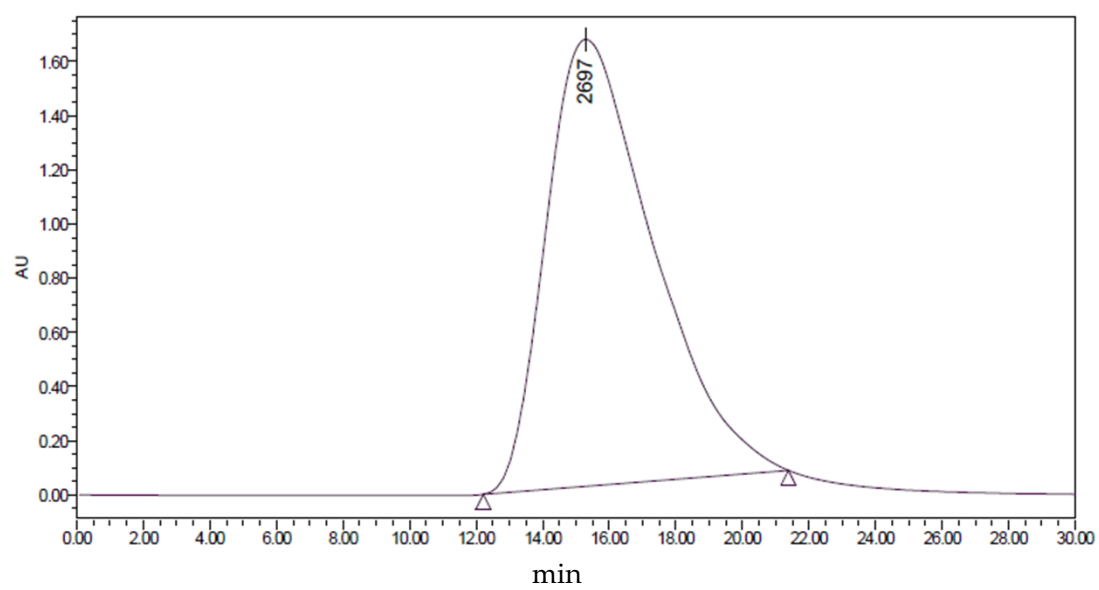

Figure S1. Gel permeation chromatography of AAA.

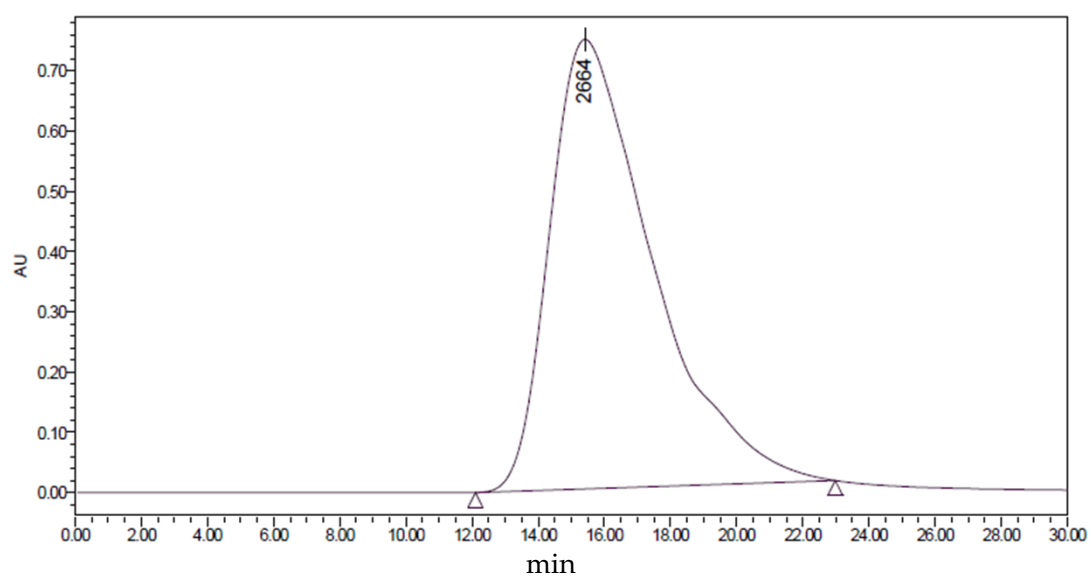

Figure S2. Gel permeation chromatography of ABA-A.

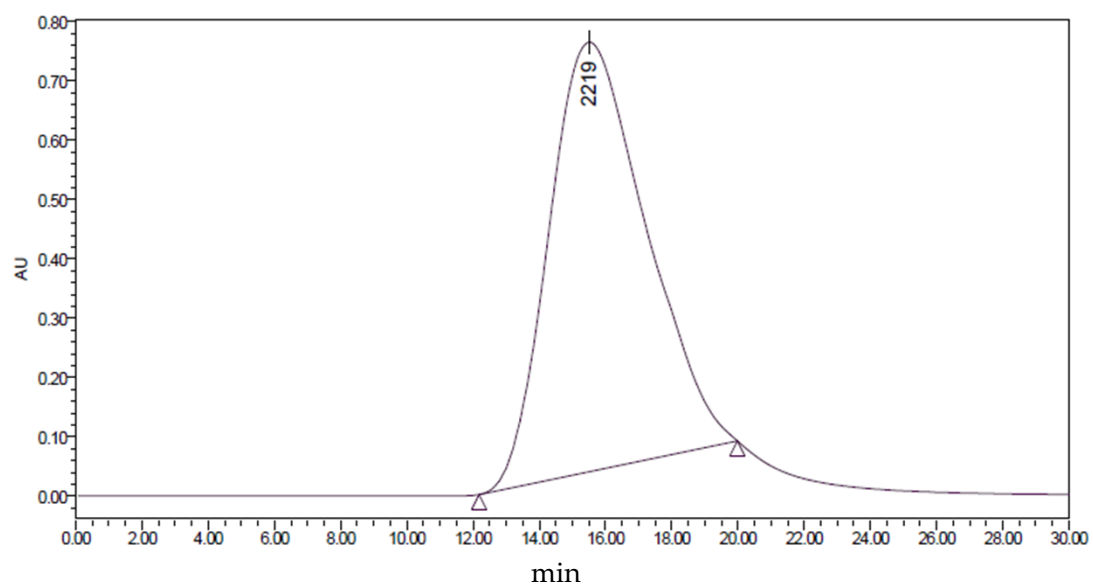

Figure S3. Gel permeation chromatography of ABA-O.

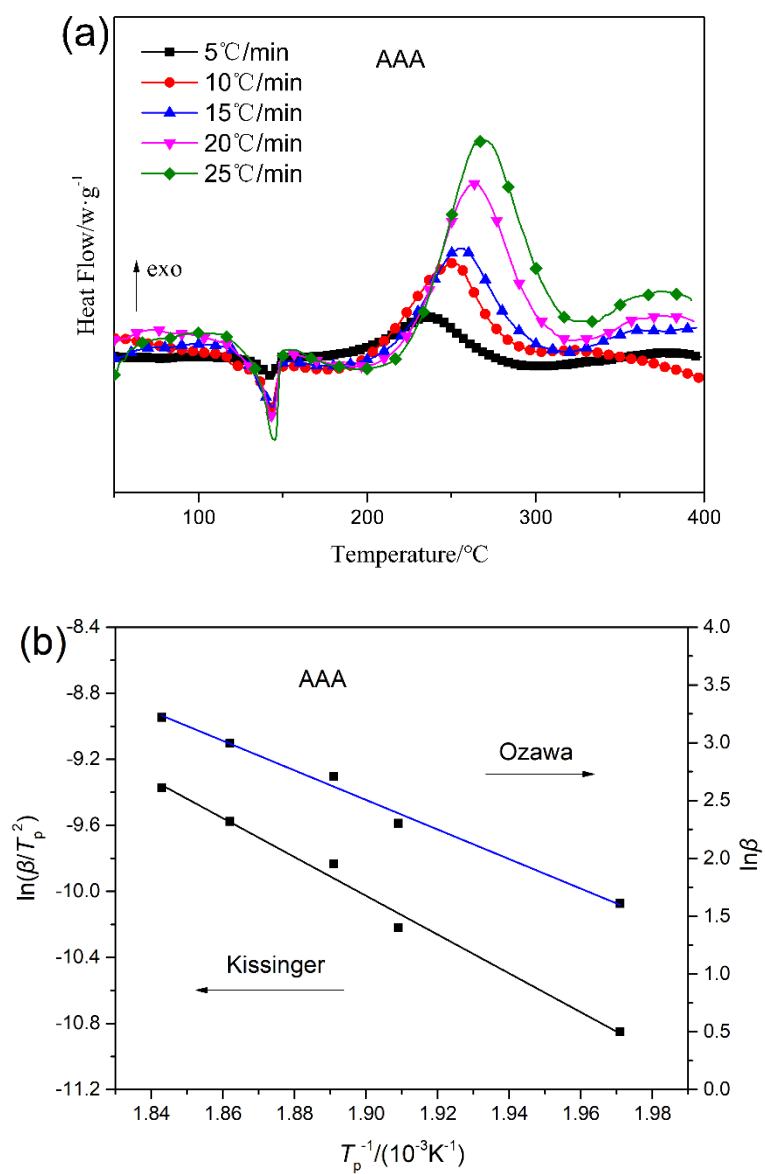

**Figure S4.** (a) DSC curves of the AAA polymer at different heating rates; (b) the relationship of  $\ln(\beta/T_p^2)$  versus  $1/T_p$  and  $\ln(\beta)$  versus  $1/T_p$ .

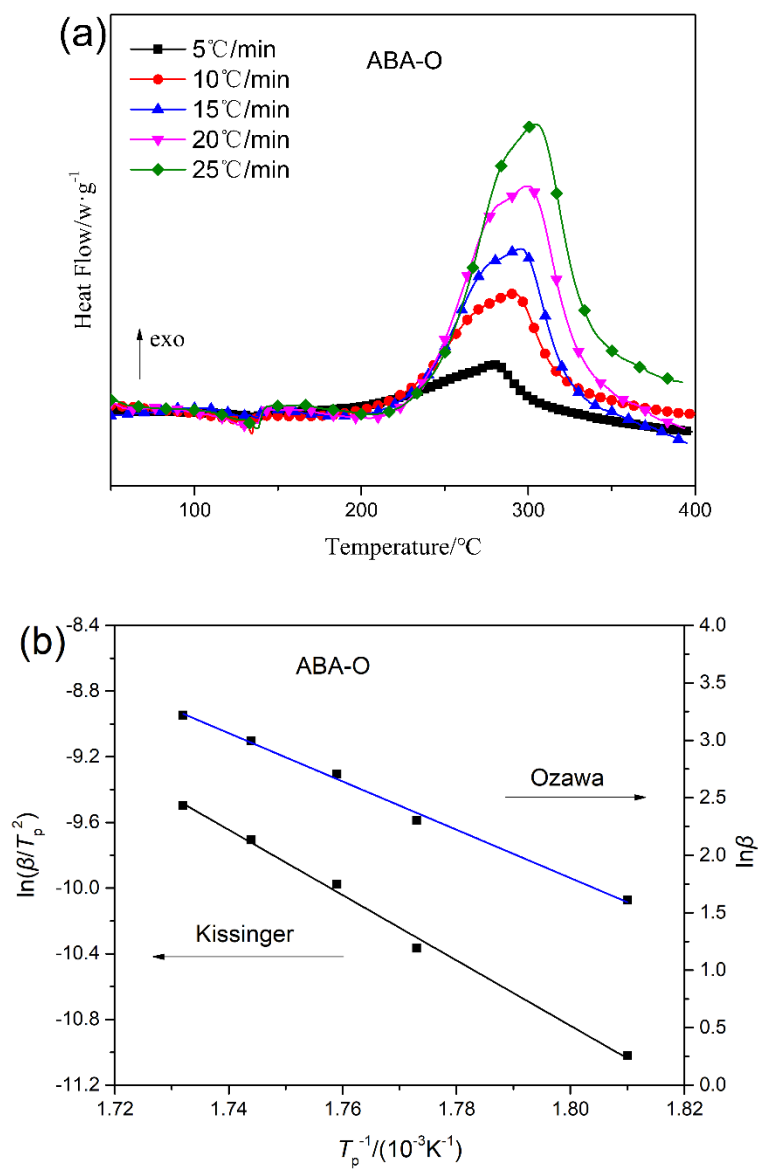

**Figure S5.** (a) DSC curves of the ABA-O copolymer at different heating rates; (b) the relationship of  $\ln(\beta/T_p^2)$  versus  $1/T_p$  and  $\ln(\beta)$  versus  $1/T_p$ .
